1 **Variation of the vaginal microbiome during and after pregnancy in**

2 **Chinese women**

3 Xiaoi Zhang <sup>1,#,a</sup>, Qingzhi Zhai <sup>2,#,b</sup>, Jinfeng Wang <sup>3,#,c</sup>, Xiuling Ma <sup>3,d</sup>, Bo Xing <sup>1,e</sup>,

4 Hang Fan <sup>1,f</sup>, Zhiying Gao <sup>2,g</sup>, Fangqing Zhao <sup>3,5,6,7\*,h</sup>, Wei Liu <sup>1,4,\*,i</sup>

5 <sup>1</sup> *State Key Laboratory of Pathogen and Biosecurity, Beijing Institute of Microbiology*  
6 *and Epidemiology, Beijing 100071, China*

7 <sup>2</sup> *Department of Obstetrics and Gynecology, First Medical Center, The General*  
8 *Hospital of the People's Liberation Army, Beijing 100853, China*

9 <sup>3</sup> *Computational Genomics Lab, Beijing Institutes of Life Science, Chinese Academy*  
10 *of Sciences, Beijing 100101, China*

11 <sup>4</sup> *Beijing Key Laboratory of Vector Borne and Natural Focus Infectious Disease,*  
12 *Beijing 100071, China*

13 <sup>5</sup> *Center for Excellence in Animal Evolution and Genetics, Chinese Academy of*  
14 *Sciences, Kunming 650223, China*

15 <sup>6</sup> *Key Laboratory of Systems Biology, Hangzhou Institute for Advanced Study,*  
16 *University of Chinese Academy of Sciences, Chinese Academy of Sciences, Hangzhou,*  
17 *China*

18 <sup>7</sup> *University of Chinese Academy of Sciences, Beijing 100049, China*

19

20 # Equal contribution.

21 \* Corresponding authors.

22 E-mail: zhfq@biols.ac.cn (Zhao F), liuwei@bmi.ac.cn (Liu W).

23 <sup>a</sup> ORCID: 0000-0002-9505-1307

24 <sup>b</sup> ORCID: 0000-0002-7328-2948

25 <sup>c</sup> ORCID: 0000-0003-4909-2738

26 <sup>d</sup> ORCID: 0000-0003-3225-0672

27 <sup>e</sup> ORCID: 0000-0001-8906-362X

28 <sup>f</sup> ORCID: 0000-0002-7927-1684

29 <sup>g</sup> ORCID: 0000-0002-5543-8961

30 <sup>h</sup> ORCID: 0000-0002-6216-1235

31 <sup>i</sup> ORCID: 0000-0002-9302-8170

32 **Running title:** *Zhang X et al / The Vaginal Microbiota of Chinese Pregnant Women*

33 Word count: 5724

34 Figures: 5

35 Tables: 0

36 Supplementary figures: 8

37 Supplementary tables: 3

38

39

40

41

42

43

44

45 **Abstract**

46 A more complete profiling of vaginal microbial communities and their variability  
47 enables a more accurate description of women microbiome. However, there is a  
48 distinct lack of information regarding the Chinese women. Composition of the vaginal  
49 microbiota during pregnancy and 6 weeks postpartum of 454 Chinese women thus  
50 was characterized in this study by sequencing V3-V4 regions of the 16S ribosomal  
51 RNA (rRNA). It showed that the vaginal microbiome varied during pregnancy and  
52 postpartum in response to abortion history, hypertensive disorders (HBP), delivery  
53 mode and maternal age. Co-variation of 21 bacterial taxa, including *Lactobacillus* and  
54 two of its species, may account for the common characteristics of vaginal microbiome  
55 under different medical histories and pregnancy outcomes. On the contrary,  
56 discriminant bacteria were significantly different between premature rupture of  
57 membranes related preterm birth (PROM-PTB) and non-PROM related PTB, and  
58 community state type (CST) I without any predominant *Lactobacillus* species in  
59 microbiota was more prevalent during pregnancy in PROM-PTB, suggesting that  
60 specific bacteria could be considered to distinguish different types of PTB. Through  
61 adding the data from Chinese women, the study will enrich the knowledge of human  
62 microbiome and likewise contribute to a better understanding of the association  
63 between the vaginal microbiome and reproductive health.

64 **KEYWORDS:** Chinese pregnant women; Vaginal microbiota; Postpartum;  
65 Pregnancy complications; Premature rupture of membranes; Preterm birth

66

## 67 **Introduction**

68 The Human Microbiome Project (HMP) has released the human microbiome data  
69 derived from thousands of individuals [1]. As an important part of the HMP and one  
70 of the most prosperous community in human body, vaginal microbiome has received  
71 much attention [2, 3]. Over recent years, evidence is accumulating that vaginal  
72 microbiome is key to women's health and a healthy pregnancy, and people gradually  
73 realize that the health status largely depends on this microbial community harboring  
74 more beneficial commensals or pathogens [4-9]. Most of the studies have introduced  
75 the compositions and shifts of the vaginal microbiome in women of African,  
76 European and American population [10, 11], however, there is a lack of knowledge  
77 about the vaginal microbiome in Chinese pregnant women.

78 In China, nearly half of the births were delivered by caesarean section in  
79 2007-2008, and the rate was even close to 60% in some cities [12-14]. With start of  
80 two-child policy in China from 2015, healthcare providers are facing the greater  
81 challenges of either a higher cesarean section rate, or an advanced maternal age, or  
82 both. In addition, in China, more than 1 million preterm infants are born per year,  
83 second only to India [15-17]. All these serious situations in obstetrics and gynecology  
84 have become major public health concerns in China and around the world. Previous  
85 studies have shown that the composition of vaginal microbiome was associated with  
86 pregnancy, delivery mode, maternal age, and preterm [4-8]. A more complete  
87 characterization of vaginal microbiome and its variability with pregnancy, delivery  
88 mode, or specific characters of pregnant women will enable a more accurate diagnosis

89 of women who truly possess an abnormal vaginal microbiome.

90 In recent years, our understanding of vaginal microbiome has broadened by  
91 using cultivation independent high-throughput sequencing. Ravel et al. performed a 16S  
92 ribosomal RNA (rRNA) gene survey on vaginal samples from 396 North American  
93 women represented four ethnic groups [18]. They divided the vaginal microbiome  
94 into five community state types (CSTs) based on the species of dominant bacteria.  
95 CST I, CST II, CST III and CST V was found to be predominated by *Lactobacillus*  
96 *crispatus*, *Lactobacillus gasseri*, *Lactobacillus iners*, and *Lactobacillus jensenii*,  
97 respectively, and CST IV was defined as lacking *Lactobacillus spp.* and comprising a  
98 diverse set of strict and facultative anaerobes. Following longitudinal study in white,  
99 black, and Hispanic reproductive-age women over 16 weeks, it was suggested that  
100 CSTs was dynamic in some women, but relatively stable in the others [19]. Thereafter,  
101 CSTs were widely used in the studies of the association between the vaginal  
102 microbiome and reproductive health for its effective handle.

103 To date, some studies linking the vaginal microbiome to preterm birth (PTB)  
104 have yielded mixed and even discordant results [4-7]. Romero et al. found no  
105 association between vaginal microbiome and either premature rupture of membranes  
106 (PROM) related or non-PROM related PTB in a predominantly African American  
107 cohort [4]. One study reported that CST V were associated with clinically  
108 heterogeneous PTB in two predominantly Caucasian populations [5]. Lindsay et al  
109 detected a significant positive association between CST III and non-PROM related  
110 PTB in high-risk Caucasian, Asian, and Black pregnant women [6]. Recently,

111 Digiulio et al. replicated their previously reported associations [5] between less  
112 *Lactobacillus* or more *Gardnerella* and clinically heterogeneous PTB in the low risk  
113 Stanford cohort [7]. However, their previously hypothesized association [5] between  
114 PTB and more *Ureaplasma* was not replicated in their following study [7]. Resolving  
115 these mixed and even discordant findings in prior studies requires the need for  
116 investigation of the microbiome with different types of PTB and PROM  
117 simultaneously in a more comprehensive design and a larger sample size of cohort.

118 In this study, by using sequencing of 16S rRNA gene amplicons, we  
119 characterized and compared the vaginal microbiome community of Chinese pregnant  
120 women according to multiple factors such as delivery mode, maternal age, abortion  
121 history, pre-pregnancy maternal weight status, and pregnancy complications during  
122 pregnancy and postpartum. Furthermore, the relationships between vaginal  
123 microbiome and the clinical features of adverse pregnancy outcomes, in particular  
124 PTB, were analyzed. We wanted to expand the current understanding for the vaginal  
125 microbiome in Chinese pregnant women and whether the microbial community shifts  
126 over time or under certain conditions.

## 127 **Results**

128 From July to December 2016, totally 474 pregnant Chinese women attending the  
129 Department of Obstetrics at the 301 Hospital (Beijing) for regular check-ups were  
130 enrolled in this study. Of the 474 volunteers recruited, 20 pregnant women were  
131 excluded because of medical complications (from fetal or pregnant women) requiring  
132 induction of labor. Of 454 women included in final analyses, vaginal swabs of 142

133 pregnant women were sampled at early stage of pregnancy ( $\leq 18$  gestational weeks),  
134 207 were sampled at late stage of pregnancy ( $27 \leq$  gestational weeks  $< 42$ ), and 98  
135 were sampled 6 weeks postpartum (Supplementary Table S1). Using 16S rRNA-based  
136 sequencing we obtained a total of 27,171,551 high-quality sequences from the vaginal  
137 samples of Chinese pregnant women, with median 59,912 and interquartile range  
138 57,311-62,351 sequences per sample. Totally 6343 operational taxonomic units  
139 (OTUs) were generated with  $\geq 97\%$  sequence similarity.

140 **The vaginal microbial community shifts significantly from pregnancy to**  
141 **postpartum**

142 Alpha diversity, as quantified by the Chao1 index, was significantly higher ( $P < 0.001$ )  
143 in the vaginal microbiome postpartum than pregnancy (Figure 1A). The other four  
144 diversity indices showed consistent results (Supplementary Figure S1A-D), indicating  
145 that the microbial richness may have increased dramatically after delivery. Similarly,  
146 significant differences were also found in  $\beta$  diversities based on the weighted UniFrac  
147 dissimilarities (ANOSIM  $R = 0.511$ ,  $P = 0.001$ ) between pregnancy and postpartum  
148 (Figure 1B and Supplementary Figure S2A-D). Moreover, vaginal samples from  
149 pregnancy clustered more closely.

150 For each taxonomic category, the difference was rather large. At the phylum  
151 level, only the relative abundance of Firmicutes was higher during pregnancy than  
152 postpartum, while more Actinobacteria, Proteobacteria, Bacteroidetes and other 7  
153 phyla appeared in postpartum women (Figure 1C). *Lactobacillus* genus and 5 of its  
154 species *L. crispatus*, *L. gasseri*, *L. iner*, *L. jensenii*, and *L. reuteri* were significantly

155 higher, and dozens of genera such as *Prevotella*, *Atopobium*, *Acinetobacter* and  
156 *Sneathia* were significantly lower during pregnancy (Figure 1D and Supplementary  
157 Table S2).

158 In view of the obvious difference of *Lactobacillus* before and after birth, we  
159 identified four CSTs from the vaginal microbiome of Chinese pregnant women  
160 (Supplementary Figure S3 and Supplementary Table S3). CST I and CST III were *L.*  
161 *crispatus* and *L. iners* dominated, respectively. Both CST IV-A and CST IV-B were  
162 non-*Lactobacillus* dominated, and the difference between them is that some women in  
163 the former still retained a certain amount of *L. crispatus*, *L. iners*, *L. jensenii* and/or *L.*  
164 *gasseri*, while the latter contained more *Gardnerella*. The most prevalent CSTs  
165 observed in Chinese pregnant women was CST I (41.9%), followed by CST IV-A  
166 (31.1%), CST III (18.7%), and CST IV-B (8.3%). Samples of pregnancy source  
167 distributed in all types of CSTs, but mainly in CST I and CST III. In contrast,  
168 postpartum samples were basically found in CST IV, especially had greater numbers  
169 of CST IV-A ( $\chi^2 = 92.08$ ,  $P < 0.001$ ). These results indicate that in Chinese women,  
170 vaginal microbiome lacks a portion of *Lactobacillus* after delivery, which makes the  
171 microbial diversity becoming higher, but it is not completely occupied by harmful  
172 bacteria such as *Gardnerella*.

173 Neither significant difference in the  $\alpha$  and  $\beta$  diversity (weighted UniFrac,  
174 ANOSIM R = -0.009,  $P = 0.693$ ) (Supplementary Figure S4A-F), nor bacterial taxa  
175 differed in relative abundance was observed between early and late stages of  
176 pregnancy ( $P > 0.05$  after FDR correction, Supplementary Figure S4G-H).



177 **The vaginal microbiome during pregnancy varied by hypertensive disorders and**  
178 **abortion history**

179 During pregnancy, the  $\alpha$ -diversity of vaginal microbiome was significantly higher in  
180 pregnant women with hypertensive disorders (HBP) than without ( $P = 0.037$ , Figure  
181 2A). The relative abundance of more than 30 bacterial taxa varied significantly  
182 between HBP and control groups based on linear discriminant analysis effect size  
183 (LEfSe) analysis (Figure 2B), and almost all of these discriminating taxa were  
184 enriched rather than depleted in the case group. Suffering from HBP was not  
185 associated with a reduction in the relative abundance of *Lactobacillus*, but was  
186 accompanied by an increase in proportion of genera such as *Gardnerella*, *Atopobium*,  
187 and *Sneathia*. The results reveal that HBP may have some impact on the vaginal  
188 microbiota during pregnancy, causing abundance changes in many bacteria, and part  
189 of which was consistent with that happened after delivery (Figure 1D).

190 Significant difference was found in community structure based on the weighted  
191 UniFrac (ANOSIM  $R = 0.054$ ,  $P = 0.015$ ) between pregnant women with and without  
192 history of abortion (Figure 2C). Samples collected from women who did not have  
193 abortion history were more intensive, while those with a history of abortion were  
194 discrete. When screening for the taxonomic distinction between the two groups, only  
195 9 discriminating taxa were found (Figure 2D). The relative abundance of *L. iners* was  
196 significantly lower in pregnant women with abortion history. The clustering results  
197 indicate that the composition of vaginal microbiome is also related to abortion history.  
198 If the women had not experienced a surgical abortion in the past, their vaginal

199 microbiota would be similar, on the contrary, abortion may increase the  
200 heterogeneities between individuals, resulting in completely different community  
201 structure. Because there were more discriminating taxa that have undergone  
202 significant changes, the impress of HBP on vaginal microbiome seems to be greater  
203 than the history of abortion. This may be partly due to the fact that HBP occurring  
204 during pregnancy has a greater impact on maternal physiology which would  
205 immediately transfer to the microbiota, while the previous abortion leaves only a  
206 slight trace.

207       Although there was no significant difference in  $\alpha$  and  $\beta$  diversity, several  
208 characteristic bacteria corresponding to four factors including delivery mode,  
209 maternal age, gestational diabetes mellitus, and hypothyroidism could be found in the  
210 vaginal microbiome during pregnancy (Supplementary Figure S5).

### 211 **The vaginal microbiome postpartum varied by delivery mode and maternal age**

212 Postpartum vaginal microbiome showed a strong association with delivery mode.  
213 After delivery, the microbial diversity of vaginal microbiome in the woman who  
214 delivered by cesarean section was significantly higher than vaginally delivered  
215 women ( $P < 0.001$ , Figure 3A). Significant difference was also found in community  
216 structure based on the weighted UniFrac between women who delivered cesarean  
217 section and vaginally, with the latter had a smaller  $\beta$  diversity (ANOSIM  $R = 0.080$ ,  $P$   
218  $= 0.034$ , Figure 3B). It seems that the vaginal microbiota of the pregnant women who  
219 delivered vaginally is dominated by fewer microbial species after delivery, which also  
220 has a more similar community structure to each other. The discriminating taxa

221 identified from the LEfSe analysis further reflect that the *Lactobacillus*, which are  
222 resident of healthy women's vagina, were more abundant in the postpartum vagina of  
223 the pregnant women who delivered vaginally (Figure 3C).

224 We found maternal age is another factor associated with the variation of  
225 postpartum vaginal microbiome. Samples collected from women with advanced and  
226 young age grouped into two distinct clusters (ANOSIM  $R = 0.149$ ,  $P = 0.022$ , Figure  
227 3C), and the elder formed a more consistent community structure. Based on LEfSe  
228 analysis, the vaginal microbiome of the women with advanced age were lacking  
229 *Lactobacillus* genus, and its two species *L. iners* and *L. reuteri* after delivery (Figure  
230 3E). Besides delivery mode and maternal age, dramatic shifts in relative abundance of  
231 some bacteria were observed in the grouping of three other factors including abortion  
232 history, maternal pre-pregnancy weight status and pregnancy complications  
233 (Supplementary Figure S6).

#### 234 **Identification of common key taxa accounting for the variation of vaginal** 235 **microbiome**

236 Totally, the relative abundances of 163 bacterial taxa from phylum to genus level  
237 varied significantly between groups during pregnancy and postpartum based on  
238 LEfSe analysis (Supplementary Figure S7). These bacterial taxa rarely had overlaps  
239 across different factors, and most of the discriminating taxa were unique to each  
240 abnormal factor. Moreover, the discriminating taxa of the same factor had no  
241 consistency between prenatal and postpartum. Certain bacterial taxa associated with  
242 maternal age even showed a completely opposite trend before and after delivery. The

243 distinction of the discriminating taxa and the abundance divergence of the same taxa  
244 reflected the large differences of vaginal microbial communities during pregnancy  
245 and postpartum as well as their response to various abnormal factors.

246 Even though, several common taxa accounting for the variation of vaginal  
247 microbiome can still be identified from the 163 discriminating taxa. Relative  
248 abundance of 21 bacterial taxa was simultaneously altered in at least 2 of the 10  
249 comparisons (Figure 4A). Thirteen bacterial taxa shifted in the same direction in two  
250 comparisons, and significant differences were consistently recorded for 8 genera  
251 *Propionibacterium*, *Rheinheimera*, *Butyricimonas*, *Lactobacillus*, *Sneathia*, *Bulleidia*,  
252 *Cellulosilyticum*, and *Nosocomiicoccus*. Common taxa were more likely to present  
253 with the two factors of delivery mode and maternal age, especially the postpartum  
254 microbiome associated with maternal age. In addition, Lactobacillaceae family  
255 decreased in abundance in pregnant women who delivered cesarean section and  
256 advanced maternal age (Figure 4B). The relative abundance of *L. iners* was lowered  
257 in pregnant women who delivered without abortion history during pregnancy and  
258 those with advanced maternal age in postpartum (Figure 4C). The abundances of *L.*  
259 *reuteri* depleted in women with abortion history and advanced maternal age in  
260 postpartum (Figure 4D). These results suggest that vaginal delivery, young maternal  
261 age, and without abortion history perhaps are more appropriate for the growth of  
262 *Lactobacillus* in maternal vagina, which should be good for women's health. Some  
263 vaginal microbes showed the same response to different abnormal factors and may be  
264 more susceptible to the influence, so these bacteria together with the maternal age,

265 require special care.

266 **Variations of CSTs associated with multiple factors during pregnancy and**  
267 **postpartum**

268 To facilitate the comparison of the relationships between vaginal microbiome and  
269 different factors in different periods, we once again examined the distribution of CSTs  
270 (Figure 5 and Supplementary Table S3). We found the largest discrimination before  
271 and after delivery was that CST I and CST IV-A had the highest proportions,  
272 respectively. In the vaginal microbiome during pregnancy, the ratios of CST IV-A in  
273 the groups of cesarean section, advanced maternal age, with abortion history,  
274 overweight, with hypertensive disorders, and with hypothyroidism were remarkably  
275 higher than those of corresponding groups. It is worth noting the difference of CSTs  
276 composition between pregnant women who have normal (term) delivery compared to  
277 PTB and PROM. The term delivery group during pregnancy showed a lower CST  
278 IV-A/CST I ratio (0.35), and such ratio increased to 0.53 if PROM occurred even  
279 though there was no premature birth at last (term-PROM). In addition, a high CST  
280 IV-A/CST I ratio (1.00) was shown in the group of pregnant women who have  
281 delivered PTB, and such ratio (2.00) was particularly high in PROM complicated with  
282 PTB (PROM-preterm) during pregnancy. In the vaginal microbiome after delivery,  
283 the situation of more CST IV-A was further exacerbated, with the only exception  
284 being hypertensive disorders. The divergence between term and PTB had not  
285 disappeared, and CST I was not even detected in both PROM-preterm and preterm.

286 To further investigate the connections between vaginal microbiome and PTB and

287 PROM, microbial composition was compared between each group during pregnancy  
288 and postpartum. The relative abundances of 68 bacterial taxa, including 1 phylum, 3  
289 classes, 9 orders, 18 families, 34 genera, and 3 species varied significantly between  
290 groups (Supplementary Figure S8A-G). During pregnancy, 6 bacterial taxa, including  
291 *Lactobacillus buchneri* and *Lactobacillus coryniformis*, and 2 bacterial taxa were  
292 increased in abundance in pregnant women with preterm or PROM neonate  
293 (Supplementary Figure S8A-B). When we stratified women who delivered preterm by  
294 PROM status, 3 bacterial taxa were associated with PROM related preterm  
295 (Supplementary Figure S8C), and 16 bacterial taxa were associated with non-PROM  
296 related preterm (Supplementary Figure S8D). Among women who delivered preterm,  
297 the abundances of 4 bacterial taxa were significantly higher in those with PROM  
298 compared to those without PROM (Supplementary Figure S8E). These discriminant  
299 bacteria in the vaginal microbiome, with significant changes in prenatal abundance,  
300 may be served as candidate biomarkers for predicting preterm birth. In postpartum, 20  
301 bacterial taxa, such as *L. gasseri*, were more abundant in preterm group, while 9  
302 bacterial taxa, such as *Bacillus*, were more abundant in term group (Supplementary  
303 Figure S8F). Significant differences were also recorded for the 19 bacterial taxa  
304 between pregnant women with and without PROM (Supplementary Figure S8G).

## 305 **Discussion**

306 Both cross-sectional and longitudinal studies reported that the vaginal microbiome  
307 during pregnancy was less diverse and more stable than that of postpartum [20].  
308 Chinese women have not been well represented before. To this end, this study

309 characterized the vaginal microbiome of the largest cohort of Chinese women to date.  
310 Consistent with previous studies in women of African, Hispanic or European [10, 20],  
311 we also found that diversity and composition of vaginal microbial communities are  
312 relatively stable at early and late time points in pregnancy and dramatically changed  
313 in postpartum period to be less *Lactobacillus* dominant in Chinese population.  
314 Furthermore, we found that the vaginal microbiome changed in response to abortion  
315 history and hypertensive disorders during pregnancy and delivery mode and maternal  
316 age in the postpartum period.

317 Identification of key taxa within the diverse vaginal microbiome is of great  
318 importance because they may pose differing risks for adverse health outcomes in  
319 pregnant women. Our study identified a series of significant bacterial taxa that  
320 differed significantly in relative abundance according to the delivery mode, maternal  
321 age, history of abortion, and pregnancy complications. Notably, we also found several  
322 key taxa that differed significantly in relative abundance in at least two comparisons.  
323 Considering that these key taxa were constantly mentioned to be associated with  
324 women's health in previous studies [6, 11], which point toward them as taxa of  
325 particular importance for study in the future. Other taxa, such as *Propionibacterium*  
326 enriched in cesarean section newborns [21], *Butyricimonas* enriched in the patients of  
327 Autism spectrum disorder [22] and depleted in patients with histamine intolerance [23]  
328 and thyroid cancer [24], and *Bulleidia* appears more frequently in patients with  
329 esophageal squamous cell carcinoma [25], also merit additional investigation.

330 CST is widely used in the studies of vaginal microbiome to deal with

331 inter-subject and/or intra-subject variability of women [26]. Through a comparison of  
332 this new dataset with existing datasets from Caucasian women and other countries, it  
333 revealed that the prevalence of CSTs may be different across populations. Using a  
334 large sample size of 396 North American women from four ethnic groups, including  
335 white, black, Hispanic, and Asian, Ravel et al. established five CSTs [18]. Huang et al  
336 reported the identification of four CSTs from 34 Chinese women during different  
337 pregnancy stages [27]. Considering that there is a distinct lack of information  
338 regarding the CSTs in Chinese pregnant women, our results from a population of  
339 large Chinese women contribute to a more comprehensive understanding of CSTs of  
340 Chinese pregnant women. Similar to Huang et al, we also identified four CSTs  
341 previously described: I (41.9%), III (18.7%), IV-A (31.1%), and CST IV-B (8.3%),  
342 but did not find CST II and CST V in our study population. The possible reasons of  
343 lack some CSTs in Chinese women and their difference to Caucasian women may be  
344 their living environment or ethnicity.

345         Unexpectedly, we found that changes in the vaginal microbiome community is  
346 also related to GDM, which has not been reported in neither Chinese nor Caucasian  
347 population. Compared with healthy pregnant women, we found that women suffered  
348 from GDM had a higher proportion of CST I during pregnancy, while the proportion  
349 of non-*Lactobacillus* dominated CST IV was lower. After delivery, the proportion of  
350 CST I in GDM women was still higher than that of healthy women. But unlike during  
351 pregnancy, the proportion of CST IV-B which contains more *Gardnerella* and is  
352 generally considered to be unfavorable to women's vaginal health [18], increased



353 remarkably in postpartum women who have had GDM. These results suggest that  
354 GDM may be more harmful to postpartum vaginal microbiome and health than to  
355 prenatal, and more attentions should be paid to the postpartum health of this female  
356 population.

357 In this study, we present a study design with the challenge of mixed and even  
358 discordant findings in some studies linking the vaginal microbiome to PTB in mind.  
359 Consistent with the Romero's study [4], we found no differences in the frequency of  
360 observed CSTs between women who delivered at term and those who delivered  
361 preterm. However, compared to their results which did not find key taxa differed in  
362 relative abundance [4], we found bacterial taxa were significantly different between  
363 PROM related PTB and non-PROM related PTB, indicating that different types of  
364 PTB had specific bacterial taxa. Some of contributing taxa such as *Gardnerella*,  
365 *Ureaplasma* and/or *Megasphaera* could be considered for developing predictive  
366 models in Chinese population. We can replicate previously reported association  
367 between more *Gardnerella*, *Ureaplasma* or *Megasphaera* and clinically  
368 heterogeneous PTB in cohorts of predominantly African descent in postpartum stage  
369 [5, 7]. The previously hypothesized associations between less *Lactobacillus*  
370 abundance and PTB in cohorts of predominantly African descent, more *L. iners*  
371 abundance and PTB in cohort of predominantly European descent were not replicated  
372 in our study [5-7]. The differences between previous studies and our results strongly  
373 suggest that PBT-microbiome associations may be racially-dependent. Further  
374 population-specific studies are needed to assess the impacts of the association

375 between vaginal microbiome and PTB and to identify population-specific key taxa.

376 Although the present study represents the most extensive examination of the  
377 vaginal microbiome of Chinese pregnant women to date, in reviewing of our results,  
378 several limitations should be considered. First, this is a cross-sectional study in which  
379 samples were obtained at a single time point. Looking forward, prospective  
380 longitudinal studies are also needed to confirmed our results. Secondly, studies using  
381 metagenomic sequencing are needed in the future to provide more detailed  
382 information about the function and changes in the vaginal microbiome. In addition,  
383 absence of a concurrent analysis of host factors is a likely reason for the variable  
384 conclusions [28].

## 385 **Conclusions**

386 This is the first study to characterize a Chinese cohort of this size. We identified  
387 measurable differences in vaginal microbiome of Chinese pregnant women according  
388 to delivery mode, maternal age, and history of abortion and hypertensive disorders,  
389 with possible consequences for both short- and long-term health. The study also  
390 demonstrated that PBT-microbiome associations are population-dependent and  
391 reveals new insights into ethnic and biogeographical effects upon the association  
392 between PTB and vaginal microbiome. With the realization that our understanding of  
393 the microbiome is as good as the diversity of people sampled, this dataset will provide  
394 valuable information for future research and contribute to a more comprehensive  
395 understanding of the correlation between bacterial community and Chinese pregnant  
396 women.

397 **Materials and methods**

398 **Patients and samples**

399 The study was performed with the approval of the Ethical Committee of Beijing  
400 Institute of Microbiology and Epidemiology and conducted according to the  
401 principles expressed in the Declaration of Helsinki. From July to December 2016,  
402 totally 474 pregnant Chinese women attending the Department of Obstetrics at the  
403 301 Hospital (Beijing) for regular check-ups were enrolled in this study. All  
404 participants provided informed consent. Information regarding demographic  
405 characteristics, medical history, clinical manifestation, laboratory test results were  
406 prospectively collected using a standard questionnaire. For each participant, a cotton  
407 swab was used to collect discharge from posterior vagina. The samples were stored at  
408 -20°C upon collection. All samples were stored at -80°C within 4 hours until  
409 metagenomic DNA extraction.

410 **Processing of microbial samples**

411 Microbial DNA was extracted from vaginal swabs and sterile water using the DNA  
412 extraction kit (Cat No. 69504, Qiagen, Hilden, Germany) according to manufacturer's  
413 protocols. DNA concentration and purity were measured by Qubit 3.0 (Cat No.  
414 Q33216, Thermo Fisher Scientific, Waltham, MA). DNA was amplified using  
415 polymerase chain reaction (PCR) with a pair of barcoded primers (341F:  
416 CCTAYGGGRBGCASCAG; 806R: GGACTACNNGGGTATCTAAT) targeting the  
417 V3-V4 region of 16S rRNA gene. Each PCR reaction was conducted in a 30µL  
418 reaction system with 15µL of Phusion High-Fidelity PCR Master Mix (Cat No.

419 F531L, New England BioLabs, Ipswich, MA), 0.2 $\mu$ M of forward and reverse primers,  
420 and about 10ng DNA templates. Negative extraction controls and blank controls with  
421 sterile water as the PCR template were included. Same volume of 1X loading buffer  
422 (contained SYBR green) was mixed with PCR products and then electrophoresis was  
423 operated on 2% agarose gel for detection. Samples with bright main strip between  
424 400-450bp were chosen for further experiments. PCR products were pooled in  
425 equimolar ratios. Then, the mixture was purified with GeneJET Gel Extraction Kit  
426 (Cat No. K0691, Thermo Fisher Scientific, Waltham, MA). Sequencing libraries were  
427 constructed using NEB Next Ultra DNA Library Prep Kit for Illumina (Cat No.  
428 E7370L, New England BioLabs, Ipswich, MA) following manufacturer's  
429 recommendations. The library quality was assessed on the Agilent Bioanalyzer 2100  
430 system (Agilent Technologies, Santa Clara, CA). At last, the library was sequenced  
431 on an Illumina HiSeq2500 platform (Illumina, San Diego, CA) and 250bp paired-end  
432 reads were generated.

### 433 **Bioinformatics and statistical analysis**

434 Paired-end reads were merged into long sequences based on the overlaps between  
435 reads1 and reads2 by using FLASH [29]. Merged sequences then were analyzed using  
436 QIIME 1.9.1 software package [30]. First, sequences were filtered by QIIME quality  
437 filters. Then we used pick\_de\_novo\_otus.py to pick OTUs in addition to generate an  
438 OTU table. Sequences with a  $\geq 97\%$  similarity were assigned to the same OTUs. A  
439 representative sequence was picked for each OTU and the RDP database was used to  
440 generate taxonomic information for each representative sequence.

441 To compute Alpha diversity, the OTU table was rarified and five metrics  
442 including Chao1, observed species, PD whole tree (Faith's Phylogenetic Diversity,  
443 which adds up all the branch lengths of the phylogenetic tree as a measure of  
444 diversity), Shannon and Simpson were calculated. Rarefaction curves were generated  
445 based on these metrics. Both weighted and unweighted unifrac distances were  
446 calculated for principal coordinate analysis (PCoA). The pairwise dissimilarity  
447 between the microbial community structures was assessed using Bray-Curtis distance  
448 at the OTU level as described before [31]. The difference in microbial markers was  
449 measured using Mann-Whitney rank test and LEfSe. When multiple hypothesis tests  
450 were performed simultaneously, *P* values were corrected using Benjamini and  
451 Hochberg's false discovery rate (FDR). For the comparative analysis, only the genera  
452 and species with the abundance of > 1 and > 0.2%, respectively, in at least one of the  
453 samples were included.

454 The clustering of CSTs was done using complete linkage hierarchical clustering  
455 with five clusters as described by Ravel et al [18, 20]. CST I, CST II, CST III and  
456 CST V was predominated with *L. crispatus*, *L. gasseri*, *L. iners*, and *L. jensenii*,  
457 respectively. CST IV was defined as lacking *Lactobacillus spp.* and comprising a  
458 diverse set of strict and facultative anaerobes, and was further split into CST IV-A  
459 and CST IV-B.

#### 460 **Ethical statements**

461 The study was performed with the approval of the Ethical Committee of Beijing  
462 Institute of Microbiology and Epidemiology and conducted according to the

463 principles expressed in the Declaration of Helsinki. All participants provided  
464 informed consent.

#### 465 **Data availability**

466 The sequencing data has been submitted to GSA at the National Genomics Data  
467 Center, with the accession ID CRA002692.

#### 468 **Authors' contributions**

469 FZ and WL conceived the study. XZ and JW designed the study and interpreted the  
470 data. XZ and JW wrote the paper. QZ and ZG collected the samples and conducted  
471 the experiments. XZ, JW, XM, BX, HF, FZ and WL analyzed the data and created the  
472 graphs. All authors approved the final version of the manuscript.

#### 473 **Competing interest**

474 The authors have declared no competing interests.

#### 475 **Acknowledgments**

476 This work was supported by the National Natural Science Foundation of China  
477 (81825019, 31722031, 31670119, 31870107), the Beijing Leading Talents in Science  
478 and Technology (Z181100006318008), the China Mega-Project on Infectious Disease  
479 Prevention (2018ZX10713002-002, 2018ZX10101003-002, 2018ZX10301401), and  
480 the National Key Research and Development Program of China (2016YFC1000705).  
481 We are grateful to all the subjects, their families, and collaborating clinicians for their  
482 participation.

483

#### 484 **References**

- 485 [1] Ding T, Schloss PD. Dynamics and associations of microbial community types across the human  
486 body. *Nature* 2014;509:357-60.
- 487 [2] Reid G. Therapeutic Opportunities in the Vaginal Microbiome. *Microbiol Spectr* 2017;5.
- 488 [3] Millar MR. The relationship between the vaginal microbiome and human health. *BJOG*  
489 2017;124:70.
- 490 [4] Romero R, Hassan SS, Gajer P, Tarca AL, Fadrosch DW, Bieda J, et al. The vaginal microbiota of  
491 pregnant women who subsequently have spontaneous preterm labor and delivery and those with a  
492 normal delivery at term. *Microbiome* 2014;2:18.
- 493 [5] DiGiulio DB, Callahan BJ, McMurdie PJ, Costello EK, Lyell DJ, Robaczewska A, et al. Temporal  
494 and spatial variation of the human microbiota during pregnancy. *Proc Natl Acad Sci U S A*  
495 2015;112:11060-5.
- 496 [6] Kindinger LM, Bennett PR, Lee YS, Marchesi JR, Smith A, Cacciatore S, et al. The interaction  
497 between vaginal microbiota, cervical length, and vaginal progesterone treatment for preterm birth risk.  
498 *Microbiome* 2017;5:6.
- 499 [7] Callahan BJ, DiGiulio DB, Goltsman DSA, Sun CL, Costello EK, Jeganathan P, et al. Replication  
500 and refinement of a vaginal microbial signature of preterm birth in two racially distinct cohorts of US  
501 women. *Proc Natl Acad Sci U S A* 2017;114:9966-71.
- 502 [8] Romero R, Hassan SS, Gajer P, Tarca AL, Fadrosch DW, Nikita L, et al. The composition and  
503 stability of the vaginal microbiota of normal pregnant women is different from that of non-pregnant  
504 women. *Microbiome* 2014;2:4.
- 505 [9] Wang J, Zheng J, Shi W, Du N, Xu X, Zhang Y, et al. Dysbiosis of maternal and neonatal  
506 microbiota associated with gestational diabetes mellitus. *Gut* 2018;67:1614-25.
- 507 [10] Serrano MG, Parikh HI, Brooks JP, Edwards DJ, Arodz TJ, Edupuganti L, et al. Racioethnic  
508 diversity in the dynamics of the vaginal microbiome during pregnancy. *Nat Med* 2019;25:1001-11.
- 509 [11] Fettweis JM, Serrano MG, Brooks JP, Edwards DJ, Girerd PH, Parikh HI, et al. The vaginal  
510 microbiome and preterm birth. *Nat Med* 2019;25:1012-21.
- 511 [12] Lumbiganon P, Laopaiboon M, Gulmezoglu AM, Souza JP, Taneepanichskul S, Ruyan P, et al.  
512 Method of delivery and pregnancy outcomes in Asia: the WHO global survey on maternal and perinatal  
513 health 2007-08. *Lancet* 2010;375:490-9.
- 514 [13] Huang K, Tao F, Raven J, Liu L, Wu X, Tang S. Utilization of antenatal ultrasound scan and  
515 implications for caesarean section: a cross-sectional study in rural Eastern China. *BMC Health Serv*  
516 *Res* 2012;12:93.
- 517 [14] Hu Y, Tao H, Cheng Z. Caesarean Sections in Beijing, China - Results from a Descriptive Study.  
518 *Gesundheitswesen* 2016;78:e1-5.
- 519 [15] Liu L, Oza S, Hogan D, Chu Y, Perin J, Zhu J, et al. Global, regional, and national causes of  
520 under-5 mortality in 2000-15: an updated systematic analysis with implications for the Sustainable  
521 Development Goals. *Lancet* 2016;388:3027-35.
- 522 [16] Blencowe H, Cousens S, Oestergaard MZ, Chou D, Moller AB, Narwal R, et al. National,  
523 regional, and worldwide estimates of preterm birth rates in the year 2010 with time trends since 1990  
524 for selected countries: a systematic analysis and implications. *Lancet* 2012;379:2162-72.
- 525 [17] Zhao X, Chen Y, Qiu G, Xiao M, Zhong N. Reducing preterm births in China. *Lancet*  
526 2012;380:1144-5; author reply 5.
- 527 [18] Ravel J, Gajer P, Abdo Z, Schneider GM, Koenig SS, McCulle SL, et al. Vaginal microbiome of  
528 reproductive-age women. *Proc Natl Acad Sci U S A* 2011;108 Suppl 1:4680-7.

- 529 [19] Gajer P, Brotman RM, Bai GY, Sakamoto J, Schutte UME, Zhong X, et al. Temporal dynamics of  
530 the human vaginal microbiota. *Science Translational Medicine* 2012;4:132ra52.
- 531 [20] MacIntyre DA, Chandiramani M, Lee YS, Kindinger L, Smith A, Angelopoulos N, et al. The  
532 vaginal microbiome during pregnancy and the postpartum period in a European population. *Sci Rep*  
533 2015;5:8988.
- 534 [21] Dominguez-Bello MG, Costello EK, Contreras M, Magris M, Hidalgo G, Fierer N, et al. Delivery  
535 mode shapes the acquisition and structure of the initial microbiota across multiple body habitats in  
536 newborns. *Proc Natl Acad Sci U S A* 2010;107:11971-5.
- 537 [22] Zhang M, Ma W, Zhang J, He Y, Wang J. Analysis of gut microbiota profiles and microbe-disease  
538 associations in children with autism spectrum disorders in China. *Sci Rep* 2018;8:13981.
- 539 [23] Schink M, Konturek PC, Tietz E, Dieterich W, Pinzer TC, Wirtz S, et al. Microbial patterns in  
540 patients with histamine intolerance. *J Physiol Pharmacol* 2018;69.
- 541 [24] Zhang J, Zhang F, Zhao C, Xu Q, Liang C, Yang Y, et al. Dysbiosis of the gut microbiome is  
542 associated with thyroid cancer and thyroid nodules and correlated with clinical index of thyroid  
543 function. *Endocrine* 2018.
- 544 [25] Chen X, Winckler B, Lu M, Cheng H, Yuan Z, Yang Y, et al. Oral Microbiota and Risk for  
545 Esophageal Squamous Cell Carcinoma in a High-Risk Area of China. *PLoS One* 2015;10:e0143603.
- 546 [26] Ma ZS, Li L. Quantifying the human vaginal community state types (CSTs) with the species  
547 specificity index. *PeerJ* 2017;5:e3366.
- 548 [27] Huang YE, Wang Y, He Y, Ji Y, Wang LP, Sheng HF, et al. Homogeneity of the vaginal  
549 microbiome at the cervix, posterior fornix, and vaginal canal in pregnant Chinese women. *Microb Ecol*  
550 2015;69:407-14.
- 551 [28] Witkin SS. Vaginal microbiome studies in pregnancy must also analyse host factors. *BJOG*  
552 2019;126:359.
- 553 [29] Magoc T, Salzberg SL. FLASH: fast length adjustment of short reads to improve genome  
554 assemblies. *Bioinformatics* 2011;27:2957-63.
- 555 [30] Caporaso JG, Kuczynski J, Stombaugh J, Bittinger K, Bushman FD, Costello EK, et al. QIIME  
556 allows analysis of high-throughput community sequencing data. *Nat Methods* 2010;7:335-6.
- 557 [31] Wang J, Jia Z, Zhang B, Peng L, Zhao F. Tracing the accumulation of in vivo human oral  
558 microbiota elucidates microbial community dynamics at the gateway to the GI tract. *Gut* 2019.

559

560



561 **Figure legends**

562 **Figure 1. The vaginal microbiome during pregnancy and postpartum was**  
563 **significantly different in microbial diversity, community structure and**  
564 **composition. (A)** Alpha diversity of the vaginal microbiome between pregnancy and  
565 postpartum. Each box plot represents the median, interquartile range, minimum, and  
566 maximum values. **(B)** Weighted ANOSIMs and principal coordinate analysis (PCoA)  
567 analysis of the vaginal microbiome during pregnancy and postpartum based on the  
568 distance matrix of UniFrac dissimilarity. The x- and y-axes represent two dimensions  
569 explaining the greatest proportion of variance in the communities. Each dot represents  
570 a sample, and each circle shows a 95% confidence interval. **(C)** Relative abundance of  
571 significantly different taxa during pregnancy and postpartum at all levels. **(D)**  
572 Relative abundance of significantly different taxa during pregnancy and postpartum at  
573 the genus level. The discriminating taxa were identified based on linear discriminant  
574 analysis effect size (LEfSe) analysis with a threshold of linear discriminant analysis  
575 (LDA) scores ( $\log_{10}$ )  $> 2$  and  $P < 0.05$ . The prefixes p\_, c\_, o\_, f\_, g\_, s\_ represent  
576 phylum, class, order, family, genus, and species respectively.

577 **Figure 2. The vaginal microbiome of pregnant women with a history of abortion**  
578 **or hypertensive disorders changed during pregnancy. (A)** Alpha diversity of the  
579 vaginal microbiome during pregnancy between pregnant women with (HBP) and  
580 without hypertensive disorders (without HBP). Each box plot represents the median,  
581 interquartile range, minimum, and maximum values. **(B)** Cladogram using LEfSe  
582 indicates the phylogenetic distribution of vaginal microbiome associated with

583 pregnant women who had hypertensive disorders with pregnancy. **(C)** Weighted  
584 ANOSIMs based on the distance matrix of UniFrac dissimilarity of the vaginal  
585 microbiome during pregnancy in pregnant women with or without abortion history.  
586 The axes represent the two dimensions explaining the greatest proportion of variance  
587 in the communities. Each dot represents a sample, and each circle shows a 95%  
588 confidence interval. **(D)** Cladogram using LefSe indicates the phylogenetic  
589 distribution of vaginal microbiome associated with pregnant women who had history  
590 of abortion. The LDA scores ( $\log_{10}$ )  $> 2$  and  $P < 0.05$  are listed. The prefixes p\_, c\_,  
591 o\_, f\_, g\_, s\_ represent phylum, class, order, family, genus, and species respectively.

592 **Figure 3. The vaginal microbiome postpartum varied by delivery mode and age**  
593 **of the pregnant woman.** **(A)** Alpha diversity of the vaginal microbiome during  
594 pregnancy between the pregnant women who delivered naturally or cesarean section  
595 in the postpartum period. Each box plot represents the median, interquartile range,  
596 minimum, and maximum values. **(B)** Weighted ANOSIMs based on the distance  
597 matrix of UniFrac dissimilarity of the vaginal microbiome in the pregnant women  
598 who delivered naturally or cesarean section in the postpartum period. The axes  
599 represent the two dimensions explaining the greatest proportion of variance in the  
600 communities. Each dot represents a sample, and each circle shows a 95% confidence  
601 interval. **(C)** Cladogram using LefSe indicates the phylogenetic distribution of  
602 vaginal microbiome associated with pregnant women who delivered naturally or  
603 cesarean section in the postpartum period. **(D)** Weighted ANOSIMs based on the  
604 distance matrix of UniFrac dissimilarity of the vaginal microbiome in the pregnant

605 women who had advanced or young age in the postpartum period. **(E)** Cladogram  
606 using LEfSe indicates the phylogenetic distribution of vaginal microbiome associated  
607 with pregnant women who had advanced or young age in the postpartum period. The  
608 LDA scores ( $\log_{10}$ )  $> 2$  and  $P < 0.05$  are listed. The prefixes p\_, c\_, o\_, f\_, g\_, s\_  
609 represent phylum, class, order, family, genus, and species respectively.

610 **Figure 4. The abundance of specific vaginal bacteria changed in multiple groups**  
611 **during pregnancy and postpartum. (A)** The relative abundances of the 21 bacterial  
612 taxa was varied significantly in two comparisons simultaneously during pregnancy  
613 and in postpartum period based on LEfSe analysis. The discriminating taxa were  
614 identified with a threshold of LDA scores ( $\log_{10}$ )  $> 2$  and  $P < 0.05$ . The boxes filled  
615 in blue and red color represent the discriminating taxa enriched and depleted in the  
616 vaginal microbiome of women who delivered cesarean, with advanced maternal age,  
617 overweight, hypertensive disorders or other pregnancy complications, and without  
618 abortion history during pregnancy and postpartum, respectively. **(B)** The relative  
619 abundance of Lactobacillaceae family in pregnant women who delivered cesarean  
620 section and advanced maternal age. **(C)** The relative abundance of *Lactobacillus iners*  
621 in pregnant women without abortion history during pregnancy and those with  
622 advanced maternal age in postpartum. **(D)** The relative abundance of *Lactobacillus*  
623 *reuteri* in women without abortion history and young maternal age in postpartum. The  
624 prefixes p\_, c\_, o\_, f\_, g\_, s\_ represent phylum, class, order, family, genus, and  
625 species respectively.

626 **Figure 5. The prevalence of community state type (CST) in the vaginal**  
627 **microbiome was different corresponding to different maternal factors.** The  
628 percentage of each CST in each group was represented by one color. The top three  
629 bars showed the mean of CST percentage in samples of all, during pregnancy, and  
630 postpartum period, respectively. Term denotes the pregnant woman who delivered in  
631 term, Term-PROM denotes premature rupture of membranes (PROM) occurred but  
632 birth in term at last, PROM-preterm denotes PROM complicated with preterm birth  
633 (PTB), and Non-PROM-preterm denotes without PROM occurred but premature birth  
634 at last.

635

### 636 **Supplementary material**

637 **Table S1. Characteristics of pregnant women included in the study (DOCX 16**  
638 **kb)**

639 **Table S2. The significantly different bacteria between pregnancy and postpartum**  
640 **(XLSX 20 kb)**

641 **Table S3. Distribution of community state types according to delivery mode, age,**  
642 **abortion, BMI, pregnancy and delivery complications (DOCX 25 kb)**

643 **Figure S1. The  $\alpha$  diversities of the vaginal microbiome during pregnancy were**  
644 **significantly lower than those of postpartum.** Differences in the  $\alpha$  diversities of the  
645 vaginal microbiome between pregnancy and postpartum according to the observed  
646 species, PD whole tree (Faith's Phylogenetic Diversity, which adds up all the branch  
647 lengths of the phylogenetic tree as a measure of diversity), Shannon and Simpson

648 index. Each box plot represents the median, interquartile range, minimum, and  
649 maximum values.

650 **Figure S2. The vaginal microbiome of pregnant women was more similar to each**  
651 **other during pregnancy.** Weighted and unweighted PCoA (A-B) and ANOSIM (C-D)  
652 based on the distance matrix of UniFrac dissimilarity of the vaginal microbial  
653 communities in pregnancy and postpartum. Respective ANOSIM R values show the  
654 community variation between the compared groups, and significant *P* values are  
655 indicated. The axes represent the two dimensions explaining the greatest proportion of  
656 variance in the communities. Each dot represents a sample.

657 **Figure S3. The vaginal microbiome of most women after delivery was classified**  
658 **as CST IV-A.** Color bar from yellow to red shows the relative abundance of each  
659 microbial taxon. The prefixes g\_, s\_ represent genus, and species respectively.

660 **Figure S4. Little difference was shown between early and late stages of**  
661 **pregnancy in microbial diversity, community structure and composition of the**  
662 **vaginal microbiome.** (A-E) Differences in the microbial diversities of the vaginal  
663 microbiome between early and late stages according to the Chao 1, observed species,  
664 PD whole tree, Shannon and Simpson index. (F) Weighted ANOSIMs and PCoA  
665 based on the distance matrix of UniFrac dissimilarity of the vaginal microbiome of  
666 early and late pregnant stages. (G) Relative abundance of the discriminating taxa in  
667 the vaginal microbiome between early and late pregnant stages at all levels. (H)  
668 Relative abundance of the discriminating taxa in the vaginal microbiome of early and  
669 late pregnant stages at the genus level. The discriminating taxa were identified based

670 on LEfSe analysis with a threshold of LDA scores ( $\log_{10}$ )  $> 2$  and  $P < 0.05$ . The  
671 prefixes p\_, c\_, o\_, f\_, g\_, s\_ represent phylum, class, order, family, genus, and  
672 species respectively.

673 **Figure S5. LEfSe analysis showed the discriminant bacteria of vaginal**  
674 **microbiome during pregnancy corresponding to multiple complex factors.** (A)  
675 Different delivery mode. (B) Advanced maternal age vs. young maternal age. (C)  
676 With vs. without gestational diabetes mellitus. (D) With vs. without hypothyroidism.  
677 The LDA scores ( $\log_{10}$ )  $> 2$  and  $P < 0.05$  are listed. The prefixes p\_, c\_, o\_, f\_, g\_, s\_  
678 represent phylum, class, order, family, genus, and species respectively.

679 **Figure S6. LEfSe analysis showed the discriminant bacteria of vaginal**  
680 **microbiome in postpartum corresponding to multiple complex factors.** (A)  
681 Different body mass index before pregnancy. (B) With vs. without abortion history.  
682 (C) With vs. without pregnancy complications. The LDA scores ( $\log_{10}$ )  $> 2$  and  $P <$   
683  $0.05$  are listed. The prefixes c\_, o\_, f\_, g\_, s\_ represent class, order, family, genus,  
684 and species respectively.

685 **Figure S7. Most discriminant bacteria of the vaginal microbiome were different**  
686 **under complex factors during pregnancy and postpartum.** The relative abundance  
687 of 163 bacterial taxa, including 5 phyla, 12 classes, 22 orders, 35 families, 86 genera,  
688 and 3 species, varied significantly between groups during pregnancy and postpartum  
689 based on LEfSe analysis. The LDA scores ( $\log_{10}$ )  $> 2$  and  $P < 0.05$  are listed. The  
690 boxes filled in blue and red color represent the discriminating taxa enriched and  
691 depleted in the vaginal microbiome of women who delivered cesarean, with advanced

692 maternal age, overweight, hypertensive disorders, hypothyroidism or other pregnancy  
693 complications, and without abortion history or gestational diabetes mellitus during  
694 pregnancy and postpartum, respectively. The prefixes p\_, c\_, o\_, f\_, g\_, s\_ represent  
695 phylum, class, order, family, genus, and species respectively.

696 **Figure S8. PTB and PROM were accompanied by some bacteria enrichment in**  
697 **the vaginal microbiome.** Based on LEfSe analysis, the relative abundances of 68  
698 bacterial taxa varied significantly between groups. The LDA scores ( $\log_{10}$ )  $> 2$  and  $P$   
699  $< 0.05$  are listed. (A) Preterm vs. term group during pregnancy. (B) PROM vs. term  
700 group during pregnancy. (C) PROM related preterm vs. term group during pregnancy.  
701 (D) Non-PROM related preterm vs. term group during pregnancy. (E) PROM related  
702 preterm vs. non-PROM related preterm during pregnancy. (F) Preterm vs. term group  
703 in postpartum. (G) PROM vs. term group in postpartum. The prefixes p\_, c\_, o\_, f\_,  
704 g\_, s\_ represent phylum, class, order, family, genus, and species respectively.

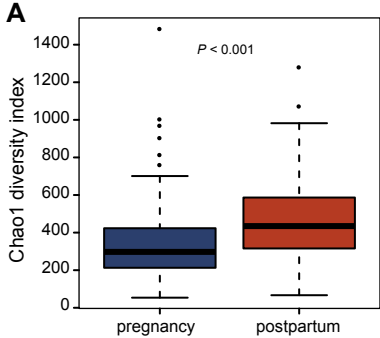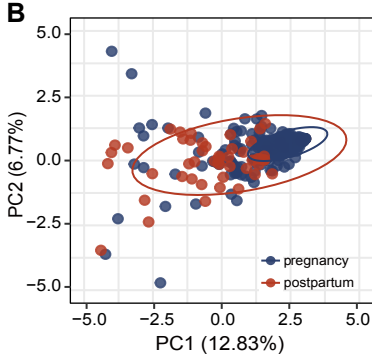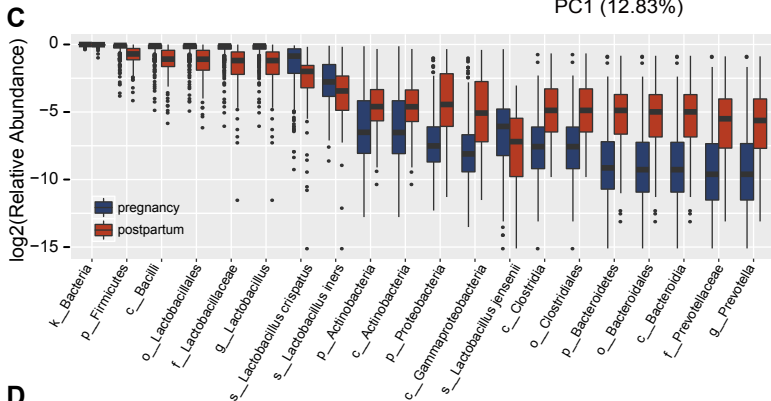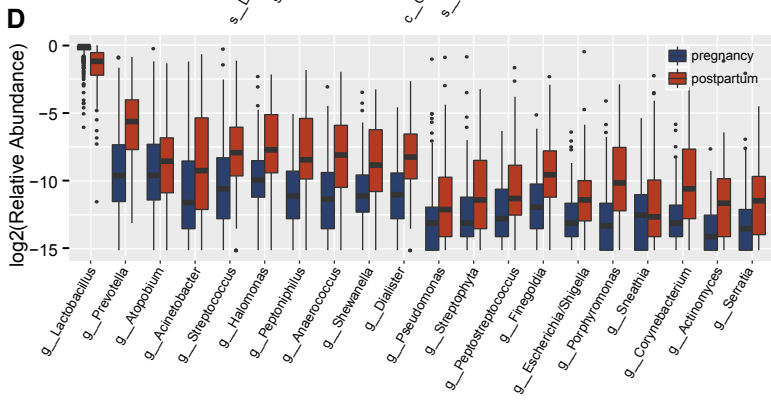



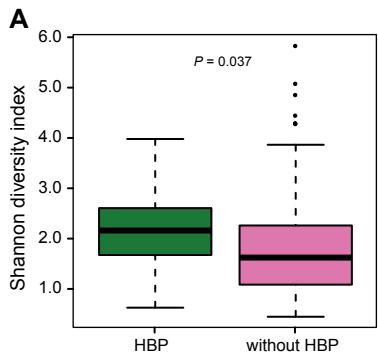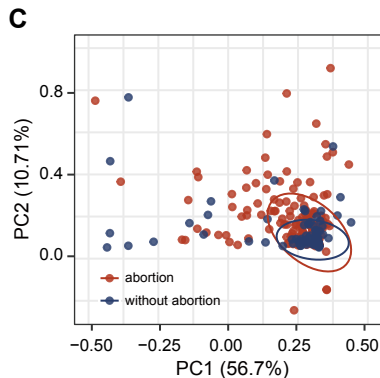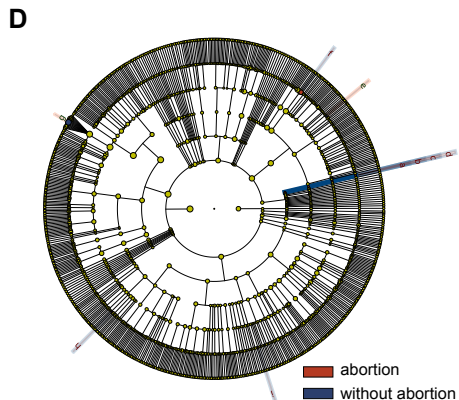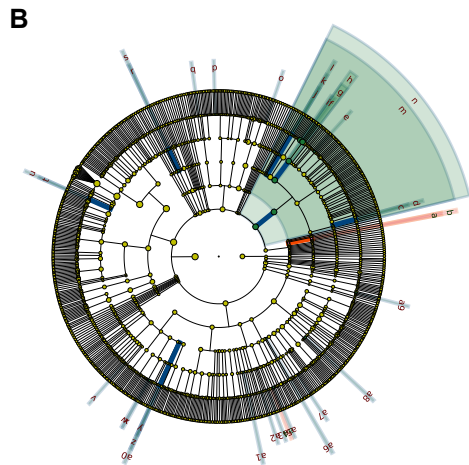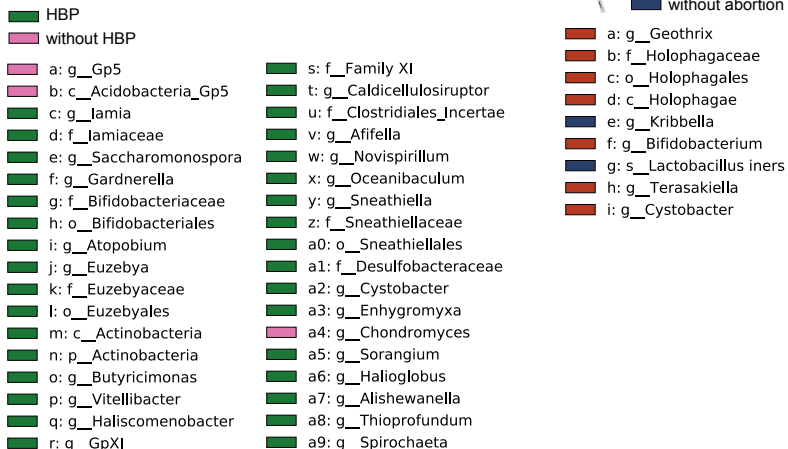

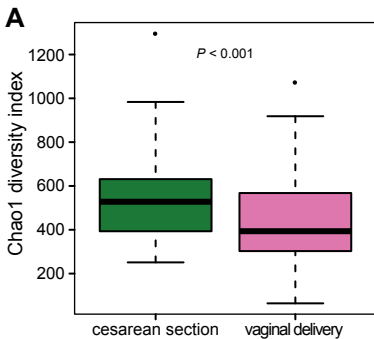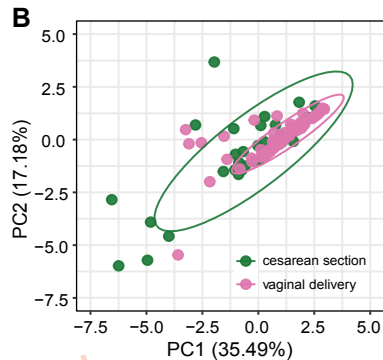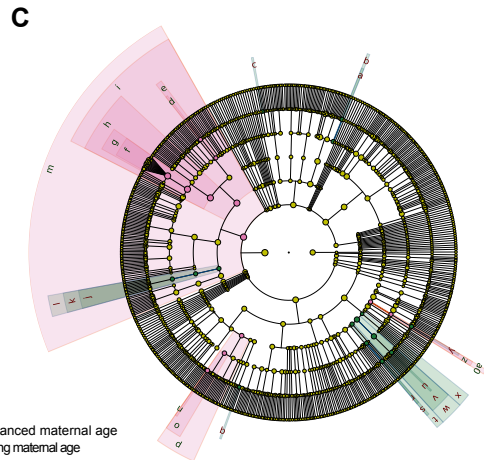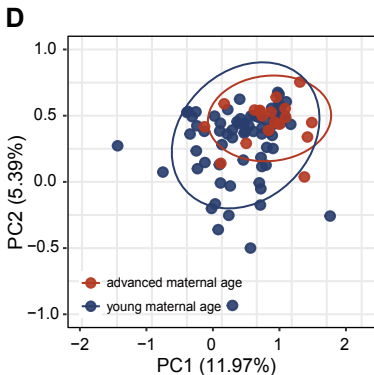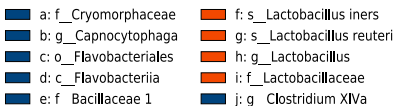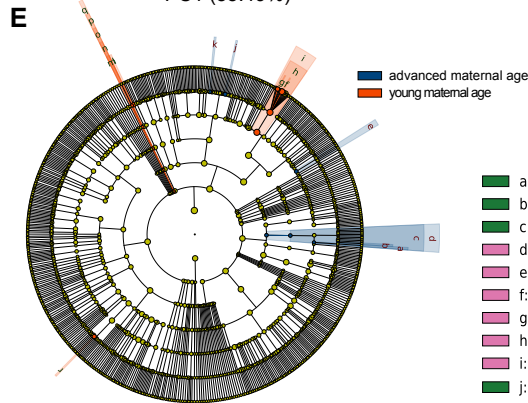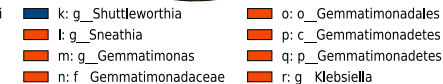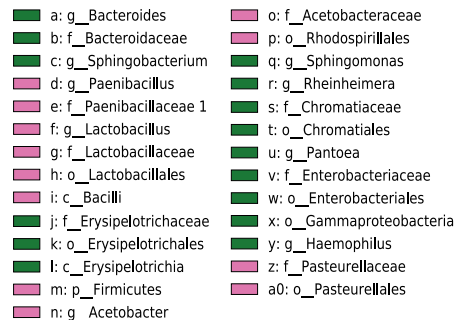

**A**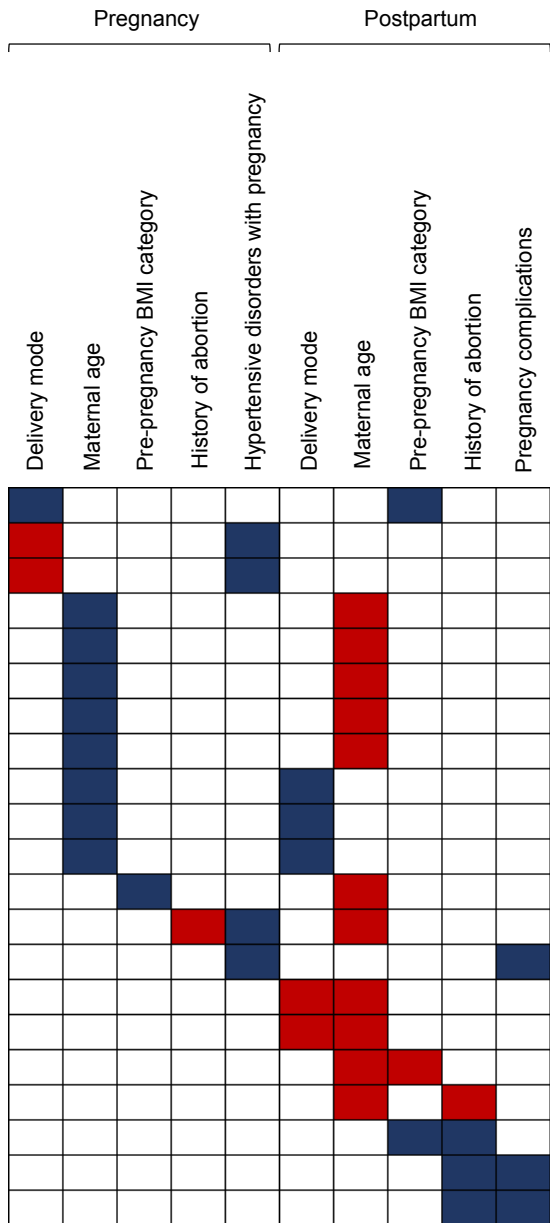**B**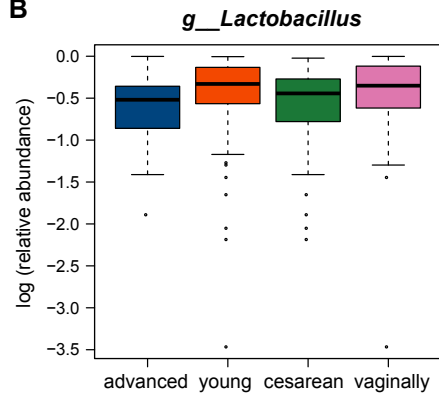**C**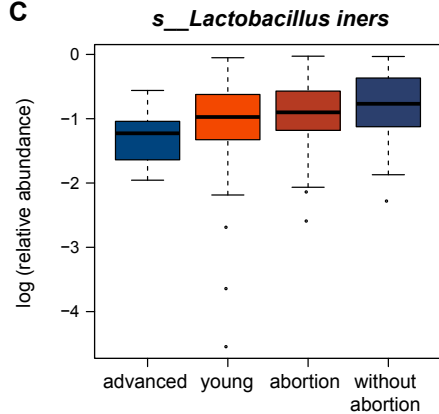**D**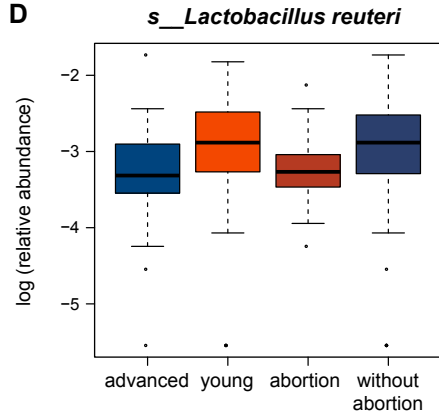

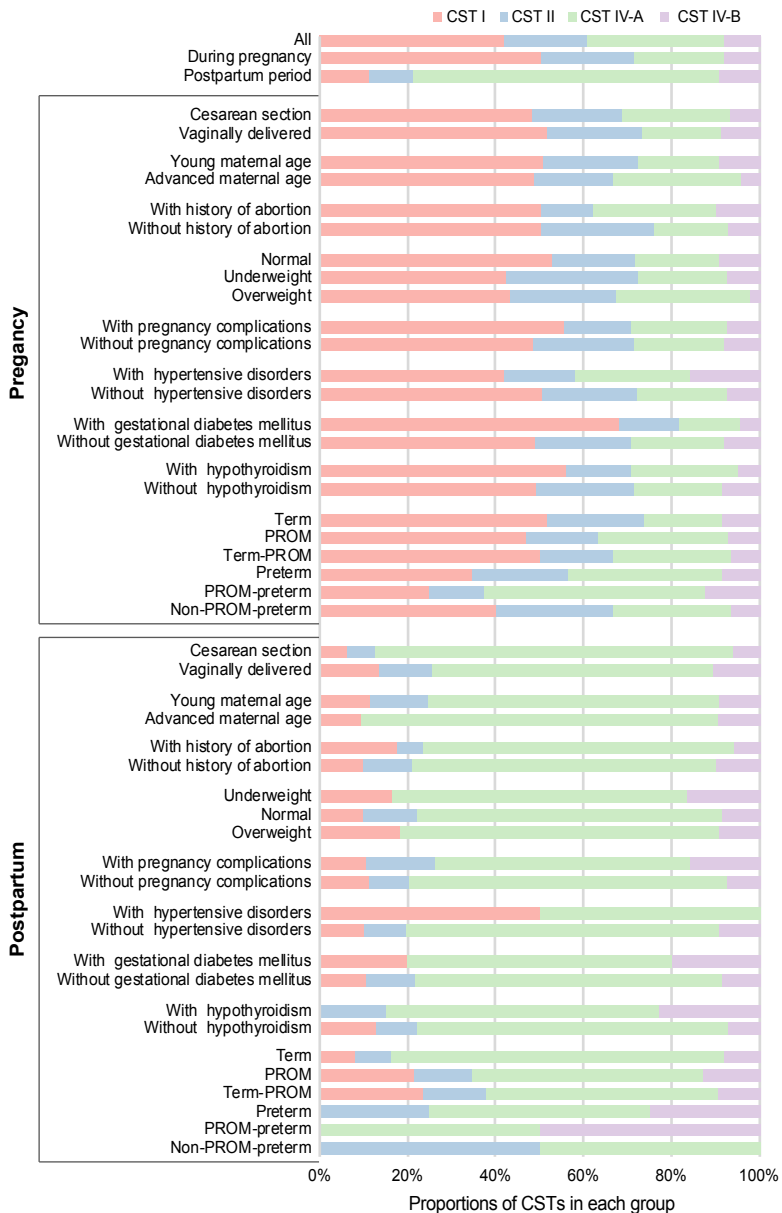

Source: https://medrxiv.org/content/10.1101/2020.07.07.20148536v1.full.pdf
